# Supplementary material
Source: PubMed Central journal article supplement (PMC3220592)
Supplement: supp_M111.275818_jbc.M111.275818-1.pdf [file supp_M111.275818_jbc.M111.275818-1.pdf]

**IDENTIFICATION OF NICOTINAMIDE MONONUCLEOTIDE DEAMIDASE OF THE BACTERIAL PYRIDINE NUCLEOTIDE CYCLE REVEALS A NOVEL BROADLY CONSERVED AMIDOHYDROLASE FAMILY**

**Luca Galeazzi<sup>#1</sup>, Paola Bocci<sup>#1</sup>, Adolfo Amici<sup>#</sup>, Lucia Brunetti<sup>#</sup>, Silverio Ruggieri<sup>#</sup>, Margaret Romine<sup>§</sup>, Samantha Reed<sup>§</sup>, Andrei L. Osterman<sup>\*</sup>, Dmitry A. Rodionov<sup>\*</sup>, Leonardo Sorci<sup>\*</sup> and Nadia Raffaelli<sup>#</sup>**

From the <sup>#</sup>Department of Molecular Pathology and Innovative Therapies, Section of Biochemistry, Università Politecnica delle Marche, Ancona 60131, Italy, the <sup>§</sup>Pacific Northwest National Laboratory, Richland, Washington 99352, USA, the <sup>\*</sup>Sanford-Burnham Medical Research Institute, La Jolla, California 92037, USA,

Running head: NMN deamidase

Address correspondence to: Raffaelli Nadia, Dipartimento di Patologia Molecolare e Terapie Innovative, Sezione di Biochimica, Via Ranieri, 60131, Ancona. Tel.: +071 2204 682; Fax: +071 2204 677; E-mail: [n.raffaelli@univpm.it](mailto:n.raffaelli@univpm.it)

<sup>1</sup>Both Authors contributed equally to this work

**Supplemental Table S1.** Primers used for gene cloning and mutant construction

**Supplemental Table S2.** List of strains and plasmids

**Supplemental Figure S1.** Phylogenomic distribution of genes involved in gapped NMN biosynthesis

**Supplemental Figure S2.** Expression of *Shewanella oneidensis* CinA (A) and *E. coli* YgaD, YfaY and YdeJ (B)

**Supplemental Figure S3.** Growth of *S. oneidensis* wild-type and *nadA*, *nadV*, *pncC*, *nadA/nadV*, *nadA/pncC* gene deletion mutants on various media

**Supplemental Figure S4.** Multiple alignment of selected PncC (PF02464) domains.

**Supplemental Figure S5.** Neighbor-joining phylogenetic tree constructed for PncC proteins identified in 86 bacterial genomes.

**Table S1. Primers used for gene cloning and mutant construction**

| Primer   | Sequence                                    | Utilization                                 |
|----------|---------------------------------------------|---------------------------------------------|
| cinA_F   | 5'-TACGGATCCTGATGAAGTTAGAGATGATT-3'         | cloning SO0272 ( <i>pncC</i> ) into pET28c  |
| cinA_R   | 5'-TACAAGCTTTTACTTACTGAAACGCCCA-3'          | cloning SO0272 ( <i>pncC</i> ) into pET28c  |
| 2342_F-O | 5'-GATCTTAAAGAAGGCACCA-3'                   | SO2342 ( <i>nadA</i> ) deletion testing     |
| 2342_R-O | 5'-TTACGTTCCGATTTTCATC-3'                   | SO2342 ( <i>nadA</i> ) deletion testing     |
| 2342_5-O | 5'-CGGAAGTGTGCGACGCC-3'                     | SO2342 ( <i>nadA</i> ) deletion, upstream   |
| 2342_5-I | 5'-AGACCCATGTTCCGGCAATGCGCTCATAACAAATCCA-3' | SO2342 ( <i>nadA</i> ) deletion, upstream   |
| 2342_3-I | 5'-GCATTGCCGAACATGGGTCTCTAAGCGCTTTGAGC-3'   | SO2342 ( <i>nadA</i> ) deletion, downstream |
| 2342_3-O | 5'-CAACTGAGGCTCAAAGG-3'                     | SO2342 ( <i>nadA</i> ) deletion, downstream |
| 0272_F-O | 5'-CAGAAGTGAAACGCAATCG-3'                   | SO0272 ( <i>pncC</i> ) deletion testing     |
| 0272_R-O | 5'-CAGTGTCAGACTCGGTG-3'                     | SO0272 ( <i>pncC</i> ) deletion testing     |
| 0272_5-O | 5'-CCATGTGAGAGTAGGTC-3'                     | SO0272 ( <i>pncC</i> ) deletion, upstream   |
| 0272_5-I | 5'-GGAGACCATGAACCGATTCCCTCTAATTTCATCATA-3'  | SO0272 ( <i>pncC</i> ) deletion, upstream   |
| 0272_3-I | 5'-GGAATCGGTTTCATGGTCTCCCGTTTCAGTAAGTAA-3'  | SO0272 ( <i>pncC</i> ) deletion, downstream |
| 0272_3-O | 5'-CAAGTATCAATTACTAATCC-3'                  | SO0272 ( <i>pncC</i> ) deletion, downstream |
| 1981_F-O | 5'-TAATCAGCAGCAATATGC-3'                    | SO1981 ( <i>nadV</i> ) deletion testing     |
| 1981_R-O | 5'-AGCAAGCCATTCCGCT-3'                      | SO1981 ( <i>nadV</i> ) deletion testing     |
| 1981_5-O | 5'-GTTAGACCGAGTGCAGG-3'                     | SO1981 ( <i>nadV</i> ) deletion, upstream   |
| 1981_5-I | 5'-ATTCATGTGCCAGTGCCGTGCGGGATTCAAGTACAT-3'  | SO1981 ( <i>nadV</i> ) deletion, upstream   |
| 1981_3-I | 5'-CACGGCACTGGCACATGAATAGAAGGGTCTTGTGG-3'   | SO1981 ( <i>nadV</i> ) deletion, downstream |
| 1981_3-O | 5'-GAAGCACAATGTGTCAAGG-3'                   | SO1981 ( <i>nadV</i> ) deletion, downstream |

**Table S2. List of strains and plasmids used in this work**

| Strains and plasmids                        | Phenotypes or characteristics                                                                                                                                                               | Reference or source |
|---------------------------------------------|---------------------------------------------------------------------------------------------------------------------------------------------------------------------------------------------|---------------------|
| <b><i>Shewanella oneidensis</i> strains</b> |                                                                                                                                                                                             |                     |
| MR-1                                        | Manganese-reducing strain (Lake Oneida, NY)                                                                                                                                                 | (1)                 |
| $\Delta nadA$                               | SO2342 deletion derivative of MR-1                                                                                                                                                          | This work           |
| $\Delta pncC$                               | SO0272 deletion derivative of MR-1                                                                                                                                                          | This work           |
| $\Delta nadV$                               | SO1981 deletion derivative of MR-1                                                                                                                                                          | This work           |
| $\Delta nadA/\Delta pncC$                   | SO2342/SO0272 double deletion derivative of MR-1                                                                                                                                            | This work           |
| $\Delta nadA/\Delta nadV$                   | SO2342/SO1981 double deletion derivative of MR-1                                                                                                                                            | This work           |
| $\Delta pncC/\Delta nadV$                   | SO0272/SO1981 double deletion derivative of MR-1                                                                                                                                            | This work           |
| <b><i>Escherichia coli</i> strains</b>      |                                                                                                                                                                                             |                     |
| WM3064 $\lambda$ pir                        | Host used for construction of pDS3.0 clones and subsequent conjugation with MR-1.<br><i>thrB1004 pro thi rpsL hsdS lacZdeltaM15 RP4-1360 delta(araBAD)567 delta dapA1341::[erm pir(wt)]</i> | (2)                 |
| <b>Plasmids</b>                             |                                                                                                                                                                                             |                     |
| pET28c                                      | Isopropyl-1-thio- $\beta$ -D-galactopyranoside-inducible expression vector; Km <sup>r</sup>                                                                                                 | Novagen             |
| pET28c- <i>cinA</i>                         | <i>cinA</i> inserted between the <i>Bam</i> HI and <i>Hind</i> III sites of pET-28c                                                                                                         | This work           |
| pDS3.0                                      | Suicide vector, Amp <sup>r</sup> , Gm <sup>r</sup> , <i>sacB</i> <sup>+</sup>                                                                                                               | (3)                 |
| pDS3.0 $\Delta nadA$                        | pDS3.0 containing sequences that flank <i>nadA</i>                                                                                                                                          | This work           |
| pDS3.0 $\Delta pncC$                        | pDS3.0 containing sequences that flank <i>pncC</i>                                                                                                                                          | This work           |
| pDS3.0 $\Delta nadV$                        | pDS3.0 containing sequences that flank <i>nadV</i>                                                                                                                                          | This work           |

| Organism                                                      | Taxonomy                                 | NMN biosynthesis |      |     | NAD biosynthesis |       |      | Nm/Na Salvage |       |
|---------------------------------------------------------------|------------------------------------------|------------------|------|-----|------------------|-------|------|---------------|-------|
|                                                               |                                          | NMPRT            | PNUC | RNK | NAMNAT           | NMNAT | NADS | NAM           | NAPRT |
| <b>GENE PATTERN 1: NMN biosynthesis via NadV</b>              |                                          |                  |      |     |                  |       |      |               |       |
| <i>Clostridium beijerincki</i>                                | Clostridia; Clostridiales                | nadV             |      |     | nadD             |       | nadE | pncA          | pncB  |
| <i>Chromobacterium violaceum</i>                              | Betaproteobacteria; Neisseriales         | nadV             |      | rnk | nadD             |       | nadE | pncA          | pncB  |
| <i>Flavobacterium johnsonia</i>                               | Bacteroidetes; Flavobacteria             | nadV             | pnuC |     | nadD             |       | nadE |               | pncB  |
| <i>Burkholderia xenovorans</i>                                | Betaproteobacteria; Burkholderiales      | nadV             |      |     | nadD             |       | nadE |               | pncB  |
| <i>Magnetospirillum magnetotacticum</i>                       | Alphaproteobacteria; Rhodospirillales    | nadV             |      |     | nadD             |       | nadE | pncA          |       |
| <i>Cytophaga hutchinsonii</i>                                 | Bacteroidetes; Sphingobacteria           | nadV             |      |     | nadD             |       | nadE |               |       |
| <i>Campylobacter fetus</i>                                    | Epsilonproteobacteria; Campylobacterales | nadV             |      |     | nadD             |       | nadE |               |       |
| <i>Shewanella spp (4)</i>                                     | Gammaproteobacteria; Alteromonadales     | nadV             |      |     | nadD             |       | nadE |               |       |
| <i>Mycoplasma gallisepticum R</i>                             | Mollicutes; Mycoplasmatales              | nadV             |      |     | nadD             |       |      |               |       |
| <i>Mycoplasma genitalium G37</i>                              | Mollicutes; Mycoplasmatales              | nadV             |      |     | nadD             |       | nadE |               |       |
| <i>Mycoplasma pneumoniae M129</i>                             | Mollicutes; Mycoplasmatales              | nadV             |      |     | nadD             |       | nadE |               |       |
| <b>GENE PATTERN 2: NMN biosynthesis via PnuC-RNK</b>          |                                          |                  |      |     |                  |       |      |               |       |
| <i>Gramella forsetii</i>                                      | Bacteroidetes; Flavobacteria             |                  | pnuC | rnk | nadD             |       | nadE | pnCA          | pncB  |
| <i>Flavobacterium sp. MED217</i>                              | Bacteroidetes; Flavobacteria             |                  | pnuC | rnk | nadD             |       | nadE | pnCA          | pncB  |
| <i>Opitutus terrae PB90-1</i>                                 | Chlamydiae; Verrucomicrobia              |                  | pnuC | rnk | nadD             |       | nadE | pnCA          | pncB  |
| <i>Pseudomonas aeruginosa (5)</i>                             | Gammaproteobacteria; Pseudomonadales     |                  | pnuC | rnk | nadD             |       | nadE | pnCA          | pncB  |
| <i>Pseudomonas entomophila</i>                                | Gammaproteobacteria; Pseudomonadales     |                  | pnuC | rnk | nadD             |       | nadE | pnCA          | pncB  |
| <i>Pseudomonas fluorescens (2)</i>                            | Gammaproteobacteria; Pseudomonadales     |                  | pnuC | rnk | nadD             |       | nadE | pnCA          | pncB  |
| <i>Pseudomonas putida W619</i>                                | Gammaproteobacteria; Pseudomonadales     |                  | pnuC | rnk | nadD             |       | nadE | pnCA          | pncB  |
| <i>Pseudomonas syringae (3)</i>                               | Gammaproteobacteria; Pseudomonadales     |                  | pnuC | rnk | nadD             |       | nadE | pnCA          | pncB  |
| <i>Janthinobacterium sp. Marseille</i>                        | Betaproteobacteria; Burkholderiales      |                  | pnuC | rnk | nadD             |       | nadE |               | pncB  |
| <i>Pseudomonas fluorescens SBW25</i>                          | Gammaproteobacteria; Pseudomonadales     |                  | pnuC | rnk | nadD             |       | nadE |               | pncB  |
| <i>Pseudomonas putida (3)</i>                                 | Gammaproteobacteria; Pseudomonadales     |                  | pnuC | rnk | nadD             |       | nadE |               | pncB  |
| <i>Pseudomonas stutzeri</i>                                   | Gammaproteobacteria; Pseudomonadales     |                  | pnuC | rnk | nadD             |       | nadE |               | pncB  |
| <i>Croceibacter atlanticus</i>                                | Bacteroidetes; Flavobacteria             |                  | pnuC | rnk | nadD             |       | nadE |               |       |
| <i>Cellulophaga sp. MED134</i>                                | Bacteroidetes; Flavobacteria             |                  | pnuC | rnk | nadD             |       | nadE |               |       |
| <i>Flavobacterium psychrophilum</i>                           | Bacteroidetes; Flavobacteria             |                  | pnuC | rnk | nadD             |       | nadE |               |       |
| <i>Tenacibaculum sp. MED152</i>                               | Bacteroidetes; Flavobacteria             |                  | pnuC | rnk | nadD             |       | nadE |               |       |
| <i>Polaribacter irgensii</i>                                  | Bacteroidetes; Flavobacteria             |                  | pnuC | rnk | nadD             |       | nadE |               |       |
| <i>Robiginitalea biformata</i>                                | Bacteroidetes; Flavobacteria             |                  | pnuC | rnk | nadD             |       | nadE |               |       |
| <i>Flavobacteriales bacterium</i>                             | Bacteroidetes; Flavobacteria             |                  | pnuC | rnk | nadD             |       | nadE |               |       |
| <i>Flavobacteria sp. BBFL7</i>                                | Bacteroidetes; Flavobacteria             |                  | pnuC | rnk | nadD             |       | nadE |               |       |
| <i>Hyphomonas neptunium</i>                                   | Alphaproteobacteria; Rhodobacterales     |                  | pnuC | rnk | nadD             |       | nadE |               |       |
| <i>Novosphingobium aromaticivorans</i>                        | Alphaproteobacteria; Sphingomonadales    |                  | pnuC | rnk | nadD             |       | nadE |               |       |
| <i>Sphingopyxis alaskensis RB2256</i>                         | Alphaproteobacteria; Sphingomonadales    |                  | pnuC | rnk | nadD             |       | nadE |               |       |
| <i>Pseudoalteromonas atlantica</i>                            | Gammaproteobacteria; Alteromonadales     |                  | pnuC | rnk | nadD             |       | nadE |               |       |
| <b>GENE PATTERN 3: NMN biosynthesis via NadV and PnuC-RNK</b> |                                          |                  |      |     |                  |       |      |               |       |
| <i>Chitinophaga pinensis</i>                                  | Bacteroidetes; Sphingobacteria           | nadV             | pnuC | rnk | nadD             |       | nadE |               |       |

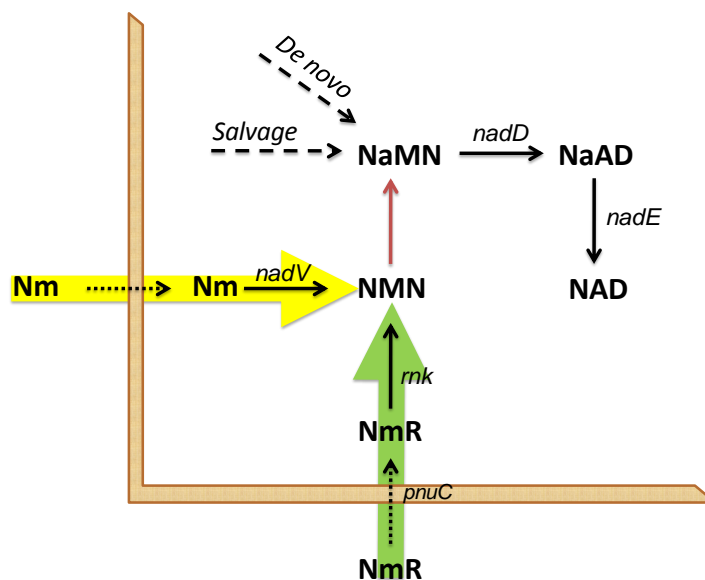

**Figure S1. Phylogenomic distribution of genes involved in gapped NMN biosynthesis.** Table lists bacterial species where active salvage pathways leading to NMN synthesis occur in the absence of *nadR* or *nadM*, the only genes encoding a NMN adenylyltransferase capable of the subsequent conversion of NMN to NAD. The diagram represents a simplified scheme of NAD biosynthesis in these bacteria. In such context, NMN deamidase activity (represented by the red arrow in the diagram) appears as an indispensable function to feed NMN intermediate into the ubiquitous downstream reactions catalyzed by NadD and NadE family of enzymes. Bacteria are divided into three subgroups according to the different routes of NMN synthesis: a) via NadV (yellow solid arrow) as in *S. oneidensis*, b) via PnuC-Rnk (green arrow) as in *Pseudomonas aeruginosa*, or via both routes as in *Chitinophaga pinensis*. Dotted arrows indicate uptake and dashed arrows indicate *de novo* and other salvage routes leading to NaMN intermediate, that vary from bacterium to bacterium.

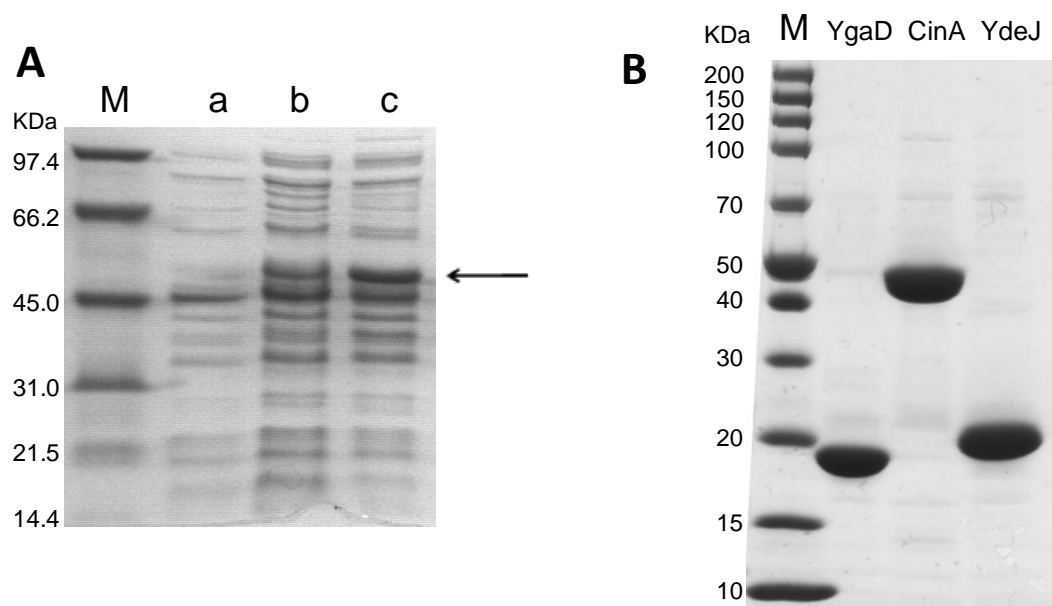

**Figure S2. Expression of *Shewanella oneidensis* CinA (A) and *E. coli* YgaD, YfaY and YdeJ (B).** (A) SDS-PAGE analysis of BL21(DE3) cell extracts obtained from cells transformed with pET28c harboring the *cinA* gene and collected before (b), and after 3 hours (c) and 12 hours (d) IPTG induction. The arrow indicates the position of the recombinant protein (B) SDS-PAGE analysis of recombinant YgaD, YfaY and YdeJ purified from extracts of overexpressing cells. Lane M: molecular mass standards.

**A**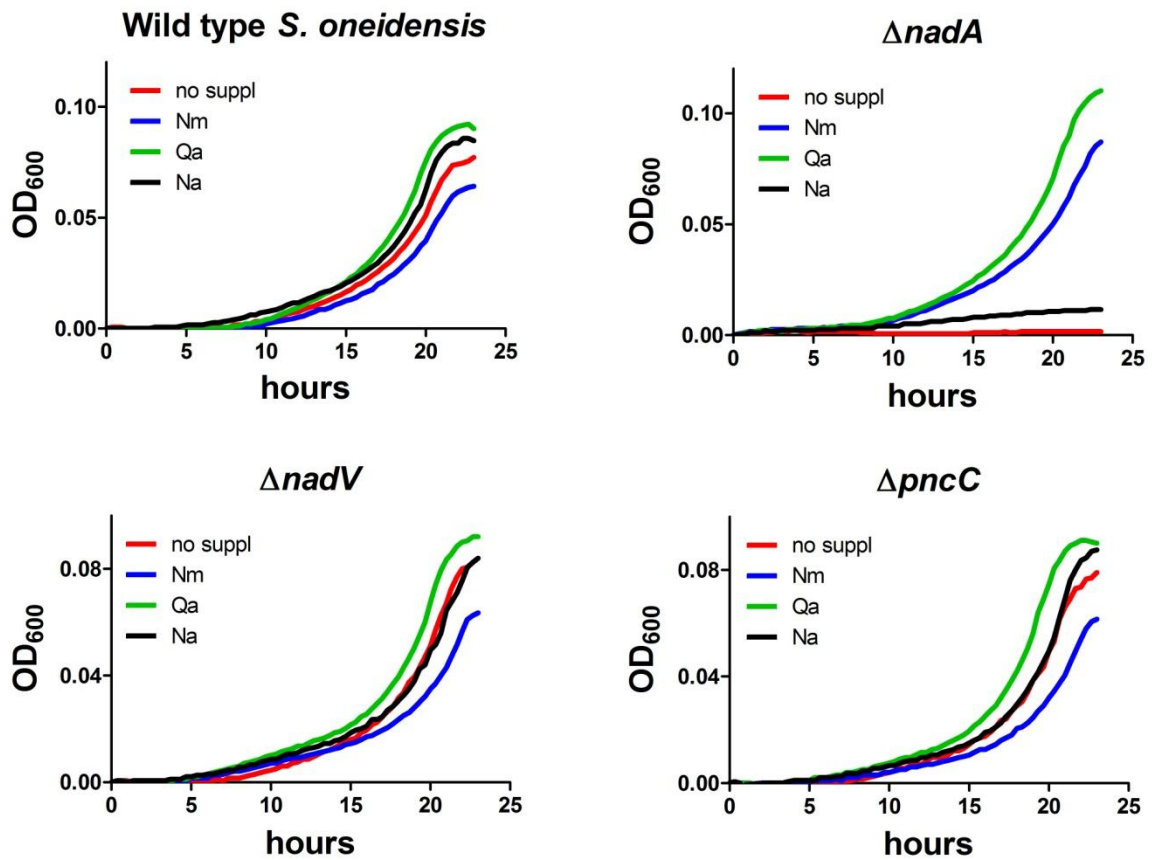**B**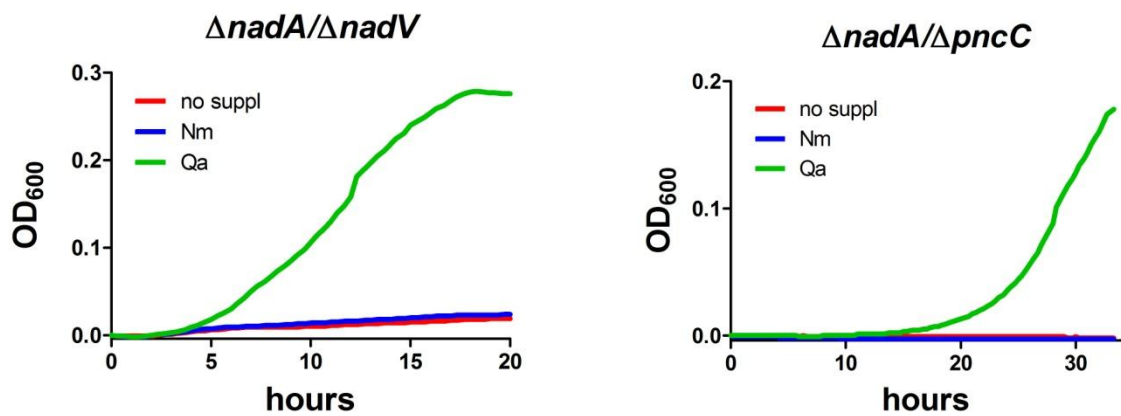

**Figure S3. Growth of *S. oneidensis* wild-type and *nadA*, *nadV*, *pncC*, *nadA/nadV*, *nadA/pncC* gene deletion mutants on various media. Minimal media were supplemented with 200  $\mu$ M each of the indicated compounds.**



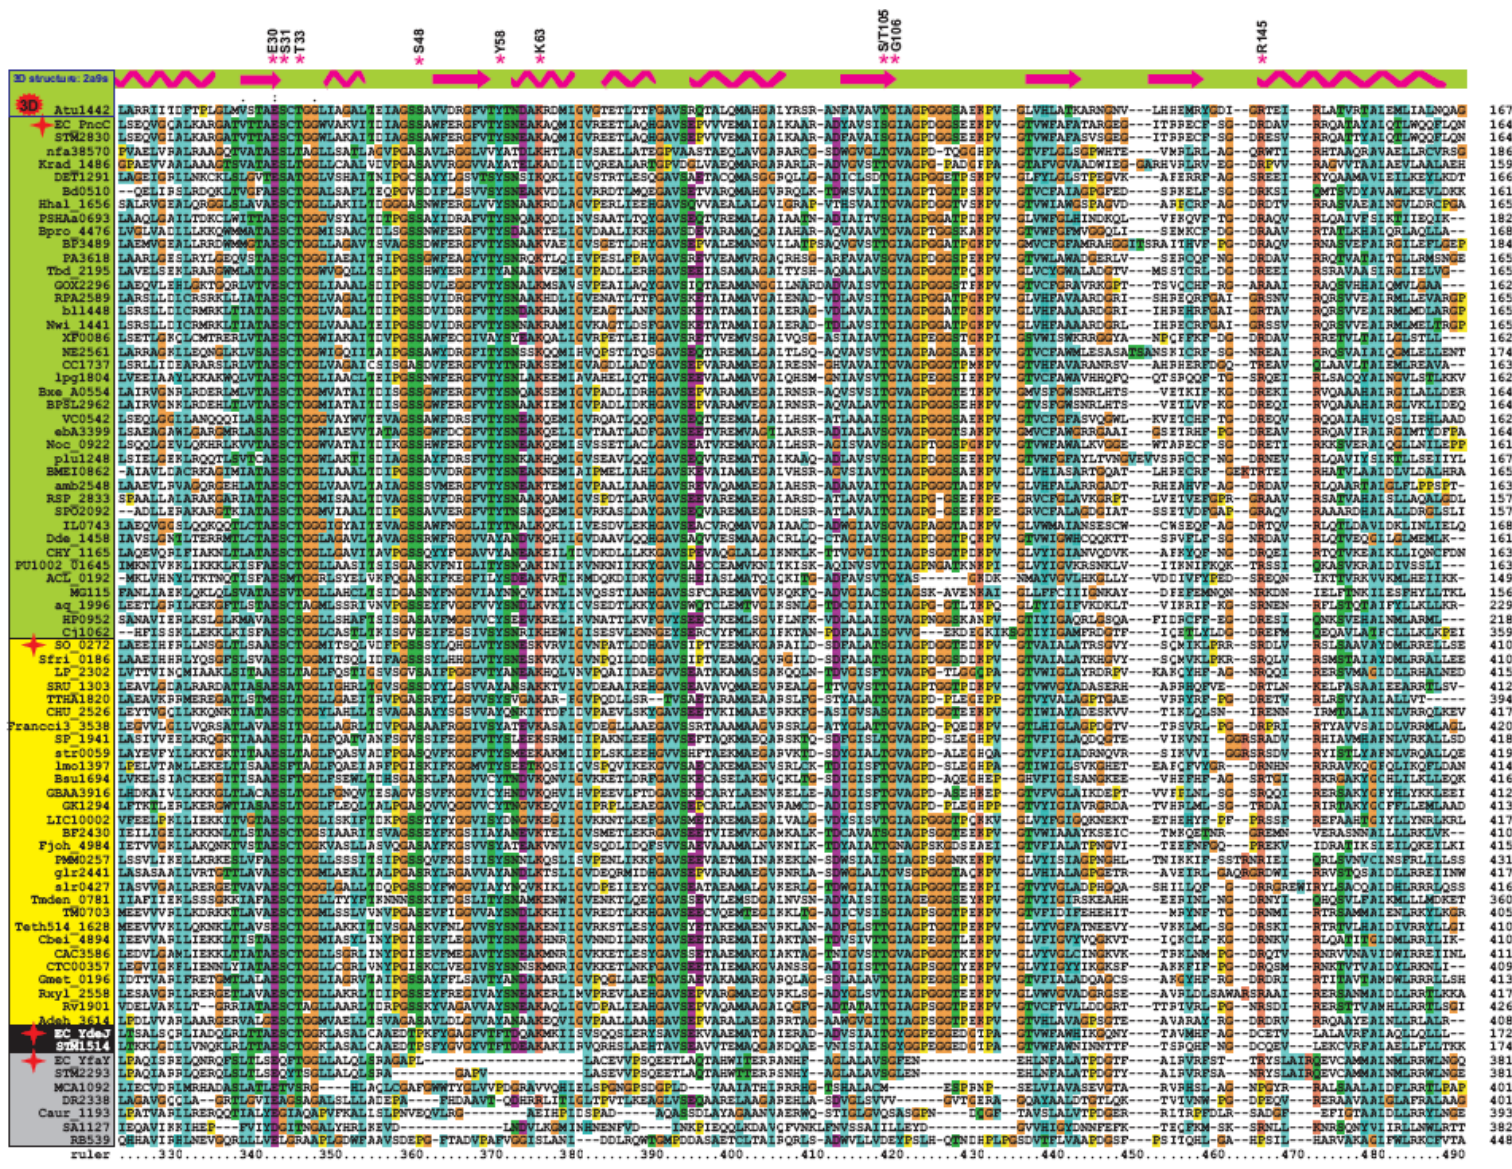

**Figure S4. Multiple alignment of PncC domains identified in 86 bacterial genomes.**

Secondary structure elements mapped according to the known 3D structure of *A. tumefaciens* are shown by arrows ( $\alpha$ -helices) and zigzags ( $\beta$ -strands). PncC domains predicted to be functional are marked by background green (for single-domain proteins) or yellow (for two-domain proteins). Non-functional domains are marked in gray (for two-domain proteins) and black (for single-domain proteins). Proteins experimentally characterized in this work are marked by a red star. Conserved residues predicted to be involved in NMN stabilization are marked by an asterisk. The complete list of analyzed bacterial genomes and gene identifiers (locus tags) is provided in Figure 7.

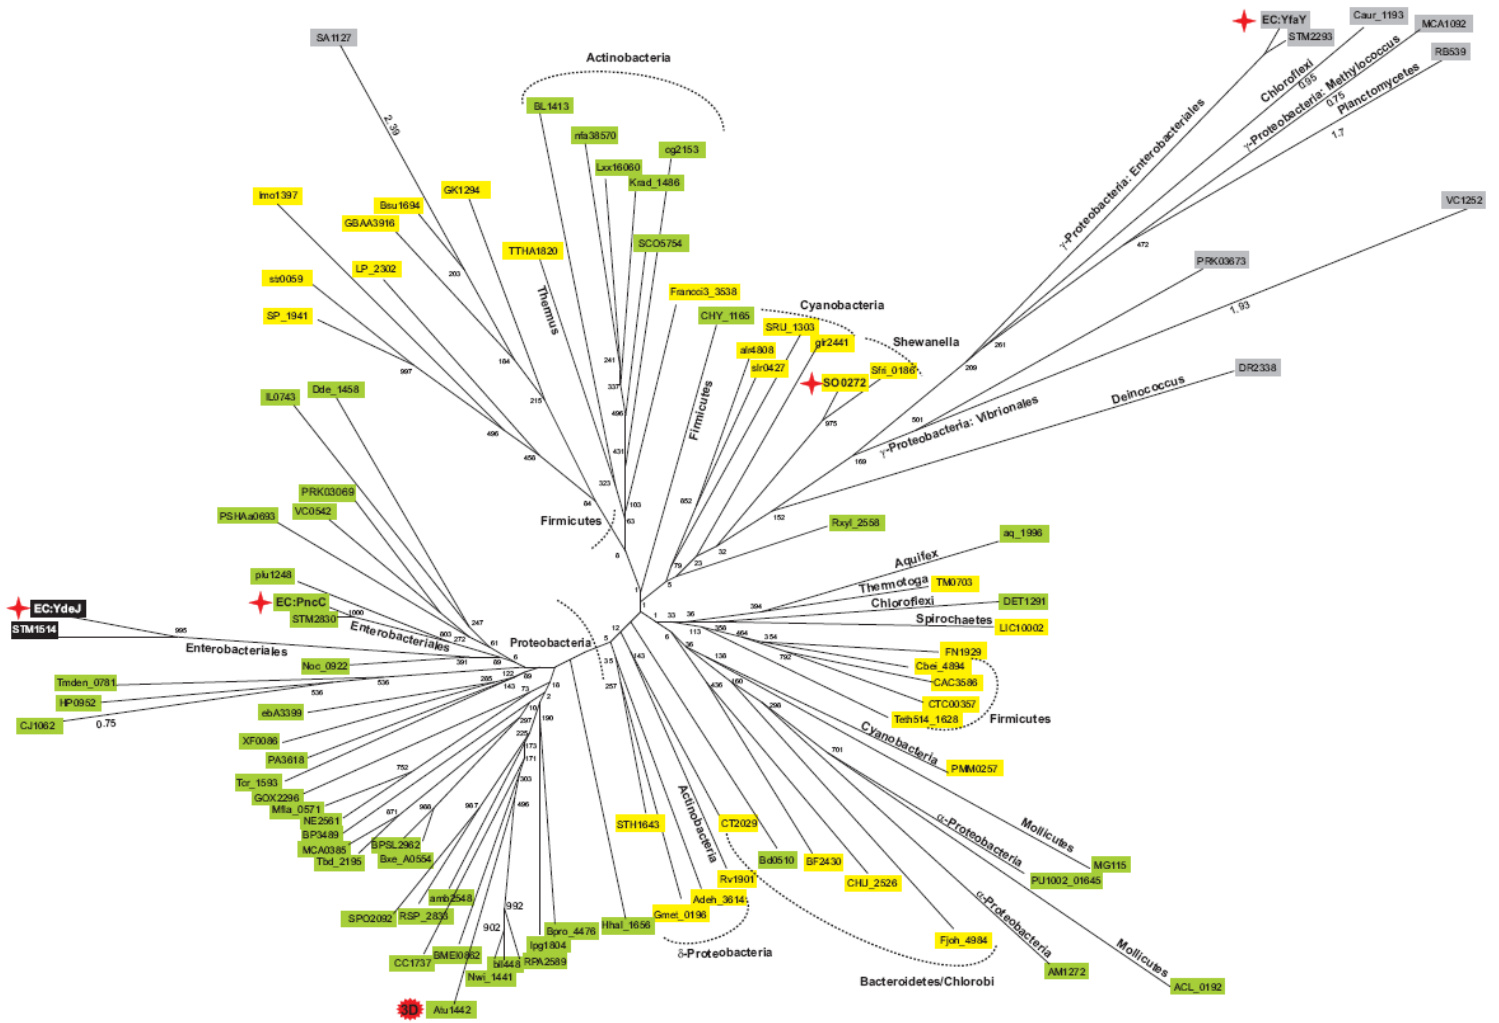

**Figure S5. Neighbor-joining phylogenetic tree constructed for PncC domains identified in 86 bacterial genomes.** The bootstrapping values with 1000 replicates are shown by numbers on each branch. The tree was constructed using ClustalW. Genome abbreviations are listed in Figure 7. Experimentally characterized proteins are marked by a red star. Color code reflects domain structure and likely enzymatic activity of NMN deamidase: green, single-domain functional enzyme; yellow, two-domain functional enzyme; gray, two-domain non-functional enzyme; black, single-domain non-functional enzyme. Experimentally characterized proteins are marked by a red star.



## REFERENCES

1. Myers, C.R., Neilson, K.H. (1988) *Science* 240, 1319–1321.
2. Saltikov, C.W., Newman, D.K. (2003) *Proc Natl Acad Sci U S A* 100, 10983-10988
3. Wan, X.F., Verberkmoes, N.C., McCue, L.A., Stanek, D., Connelly, H., Hauser, L.J. et al. (2004) *J Bacteriol* 186, 8385-8400.
